# Supplementary material for: Radiomics-Based Machine Learning Model for Diagnosis of Acute Pancreatitis Using Computed Tomography
Source: MDPI journal article supplement (doi:10.3390/diagnostics14070718), 2024-03-28
Supplement: s1 [file s1]

**Supplemental Table S1 Importance of all analyzed features in a random forest based model**

|                                        | Mean        | Median      | Minimum     | Maximum    | Decision  |
|----------------------------------------|-------------|-------------|-------------|------------|-----------|
| shape_Elongation                       | 0.20963917  | 0.48971637  | -2.29549088 | 1.5923146  | Rejected  |
| shape_Flatness                         | 2.42320248  | 2.44573467  | -0.37194873 | 4.2236132  | Rejected  |
| shape_LeastAxisLength                  | 5.78388200  | 5.86566265  | 4.41601723  | 7.2530128  | Confirmed |
| shape_MajorAxisLength                  | 1.43935261  | 1.46289603  | -0.25099999 | 3.3659761  | Rejected  |
| shape_Maximum2DDiameterColumn          | -0.09916046 | -0.14336380 | -2.03357077 | 1.5117521  | Rejected  |
| shape_Maximum2DDiameterRow             | 0.38906406  | 0.58001607  | -1.90212829 | 2.4105838  | Rejected  |
| shape_Maximum2DDiameterSlice           | 0.66038835  | 0.90508725  | -0.81539552 | 2.0052965  | Rejected  |
| shape_Maximum3DDiameter                | 4.58723576  | 4.65645036  | 1.87389796  | 6.3156002  | Confirmed |
| shape_MeshVolume                       | 9.23885788  | 9.25235686  | 7.46715843  | 10.2188769 | Confirmed |
| shape_MinorAxisLength                  | -0.54527222 | -0.64149706 | -1.78315801 | 0.7924367  | Rejected  |
| shape_Sphericity                       | 5.00638885  | 4.97530508  | 3.49440801  | 7.1465528  | Confirmed |
| shape_SurfaceArea                      | 5.76865803  | 5.70833370  | 4.25346085  | 7.0809316  | Confirmed |
| shape_SurfaceVolumeRatio               | 11.66042443 | 11.70966218 | 9.09119950  | 13.8427469 | Confirmed |
| shape_VoxelVolume                      | 9.11541488  | 9.12006238  | 7.51713260  | 10.3528376 | Confirmed |
| firstorder_10Percentile                | 3.51198151  | 3.58138335  | 1.29672870  | 5.3842298  | Tentative |
| firstorder_90Percentile                | 1.35067410  | 1.25248299  | 0.18361485  | 2.6577618  | Rejected  |
| firstorder_Energy                      | 9.01044035  | 8.94489517  | 7.87366862  | 10.5241848 | Confirmed |
| firstorder_Entropy                     | 0.81872418  | 0.87466340  | -1.18045396 | 2.5434038  | Rejected  |
| firstorder_InterquartileRange          | 4.05458399  | 4.05878301  | 1.64074558  | 6.1597799  | Confirmed |
| firstorder_Kurtosis                    | 4.25903797  | 4.30577918  | 1.85875113  | 6.1540773  | Confirmed |
| firstorder_Maximum                     | 5.37865681  | 5.39767457  | 2.57683703  | 8.0169613  | Confirmed |
| firstorder_MeanAbsoluteDeviation       | 1.26727323  | 1.48001861  | -1.06576337 | 2.7572792  | Rejected  |
| firstorder_Mean                        | 1.80831253  | 1.93518989  | 0.66874905  | 3.2224625  | Rejected  |
| firstorder_Median                      | 1.84965293  | 2.12439544  | 0.34469308  | 2.8202230  | Rejected  |
| firstorder_Minimum                     | 5.25882003  | 5.32104944  | 3.47374084  | 7.4919898  | Confirmed |
| firstorder_Range                       | 1.72615114  | 1.73171447  | 0.50600479  | 2.6698976  | Rejected  |
| firstorder_RobustMeanAbsoluteDeviation | 4.03306478  | 4.05641341  | 1.80130759  | 6.4914035  | Confirmed |
| firstorder_RootMeanSquared             | 1.79498591  | 1.81243315  | 0.55121552  | 3.2675896  | Rejected  |
| firstorder_Skewness                    | 7.27757582  | 7.40393305  | 4.68083471  | 10.0629144 | Confirmed |
| firstorder_TotalEnergy                 | 8.91737564  | 8.94917816  | 7.15839578  | 9.9716422  | Confirmed |

|                                        |            |            |             |           |           |
|----------------------------------------|------------|------------|-------------|-----------|-----------|
| firstorder_Uniformity                  | 1.76191944 | 1.90824417 | 1.08275008  | 2.2311903 | Rejected  |
| firstorder_Variance                    | 1.07937780 | 1.38134492 | -0.86725575 | 1.8599638 | Rejected  |
| glcm_Autocorrelation                   | 2.96217649 | 2.99927513 | 0.60674719  | 4.9166821 | Tentative |
| glcm_JointAverage                      | 2.96096394 | 2.90170353 | 0.92667826  | 4.6206019 | Tentative |
| glcm_ClusterProminence                 | 1.85263748 | 1.86655841 | 0.15854996  | 3.3951387 | Rejected  |
| glcm_ClusterShade                      | 4.07142517 | 3.95468526 | 1.99449083  | 6.0568867 | Confirmed |
| glcm_ClusterTendency                   | 0.95001811 | 0.70179011 | -0.82326599 | 3.6225971 | Rejected  |
| glcm_Contrast                          | 1.06022214 | 1.33921096 | -1.15744551 | 2.4823831 | Rejected  |
| glcm_Correlation                       | 0.58589491 | 0.62369369 | -1.41944943 | 2.2310027 | Rejected  |
| glcm_DifferenceAverage                 | 1.04474279 | 1.11496337 | -0.51654316 | 2.1917428 | Rejected  |
| glcm_DifferenceEntropy                 | 0.34820559 | 0.48630027 | -0.84419707 | 2.2817829 | Rejected  |
| glcm_DifferenceVariance                | 1.03802976 | 1.14618546 | -0.97158927 | 2.8510740 | Rejected  |
| glcm_JointEnergy                       | 2.83673134 | 2.86303216 | 0.30157652  | 5.0954904 | Tentative |
| glcm_JointEntropy                      | 0.43600548 | 0.62400558 | -1.20595127 | 2.2571025 | Rejected  |
| glcm_Imc1                              | 0.96719022 | 0.73225517 | -0.35281686 | 2.6105018 | Rejected  |
| glcm_Imc2                              | 1.27638772 | 1.45950138 | -0.38929169 | 2.5850083 | Rejected  |
| glcm_Idm                               | 0.90686025 | 1.02154512 | -1.23703896 | 2.6871991 | Rejected  |
| glcm_Idmn                              | 2.13410138 | 2.24944718 | -0.32386031 | 3.6736523 | Rejected  |
| glcm_Id                                | 0.89423747 | 1.16457593 | -0.62462371 | 2.0361505 | Rejected  |
| glcm_Idn                               | 2.31487653 | 2.34819823 | 0.91962655  | 3.7052605 | Rejected  |
| glcm_InverseVariance                   | 1.65284681 | 1.55516764 | 0.15691831  | 3.1975394 | Rejected  |
| glcm_MaximumProbability                | 2.79614785 | 2.85536844 | 0.54216590  | 5.2519959 | Tentative |
| glcm_SumEntropy                        | 1.54305000 | 1.81867070 | -1.13832553 | 3.2983994 | Rejected  |
| glcm_SumSquares                        | 0.47286578 | 0.68748078 | -1.01858370 | 2.2082297 | Rejected  |
| glrlm_GrayLevelNonUniformity           | 5.85097717 | 5.87887549 | 3.63440264  | 7.1486559 | Confirmed |
| glrlm_GrayLevelNonUniformityNormalized | 1.50291385 | 1.54170968 | 0.21471887  | 3.1349701 | Rejected  |
| glrlm_GrayLevelVariance                | 1.17771379 | 1.30765278 | -0.68378357 | 2.1155719 | Rejected  |
| glrlm_HighGrayLevelRunEmphasis         | 2.49782178 | 2.54543927 | 1.29986454  | 3.2418100 | Rejected  |
| glrlm_LongRunEmphasis                  | 0.54373435 | 0.03024667 | -0.42742231 | 1.8983498 | Rejected  |
| glrlm_LongRunHighGrayLevelEmphasis     | 3.05238602 | 3.01574621 | 0.63490525  | 5.2366467 | Tentative |
| glrlm_LongRunLowGrayLevelEmphasis      | 2.30045611 | 2.35253741 | 0.22356168  | 3.7723488 | Rejected  |
| glrlm_LowGrayLevelRunEmphasis          | 1.54478106 | 1.59884578 | 0.33350204  | 2.5459692 | Rejected  |

|                                        |             |             |             |            |           |
|----------------------------------------|-------------|-------------|-------------|------------|-----------|
| glrlm_RunEntropy                       | 0.23633749  | 0.33360268  | -1.04243702 | 1.7659448  | Rejected  |
| glrlm_RunLengthNonUniformity           | 7.76891287  | 7.78902528  | 6.37625470  | 9.2211188  | Confirmed |
| glrlm_RunLengthNonUniformityNormalized | 1.51715095  | 1.50543697  | 0.54438576  | 2.6051579  | Rejected  |
| glrlm_RunPercentage                    | 1.65365727  | 1.95571214  | -0.86681467 | 2.9758579  | Rejected  |
| glrlm_RunVariance                      | 1.16973319  | 1.16944483  | -0.32906954 | 2.7001232  | Rejected  |
| glrlm_ShortRunEmphasis                 | 1.86208395  | 2.07216419  | 0.40041362  | 3.4153822  | Rejected  |
| glrlm_ShortRunHighGrayLevelEmphasis    | 1.96609333  | 1.84006944  | 1.27922256  | 3.2679194  | Rejected  |
| glrlm_ShortRunLowGrayLevelEmphasis     | 1.96440500  | 2.13732033  | 0.84065458  | 2.9978123  | Rejected  |
| glszm_GrayLevelNonUniformity           | 3.98142304  | 4.07691651  | 1.89831000  | 5.6817014  | Confirmed |
| glszm_GrayLevelNonUniformityNormalized | 0.97836107  | 1.33489219  | -1.31686299 | 2.1076497  | Rejected  |
| glszm_GrayLevelVariance                | 1.54025875  | 1.39920466  | 0.46254909  | 2.9451254  | Rejected  |
| glszm_HighGrayLevelZoneEmphasis        | 1.29978128  | 1.48395131  | -0.45537443 | 2.3431475  | Rejected  |
| glszm_LargeAreaEmphasis                | 4.45249991  | 4.42380815  | 3.10441514  | 5.8229960  | Confirmed |
| glszm_LargeAreaHighGrayLevelEmphasis   | 1.49024134  | 1.56077412  | -0.55233625 | 2.9330464  | Rejected  |
| glszm_LargeAreaLowGrayLevelEmphasis    | 4.99167260  | 5.00927317  | 3.09797560  | 6.4373932  | Confirmed |
| glszm_LowGrayLevelZoneEmphasis         | 1.20395872  | 1.28459154  | -0.55066436 | 2.4458819  | Rejected  |
| glszm_SizeZoneNonUniformity            | 3.05996695  | 3.05848646  | 1.07699583  | 4.8852722  | Tentative |
| glszm_SizeZoneNonUniformityNormalized  | 0.83917414  | 1.02912731  | -0.56963038 | 2.3597478  | Rejected  |
| glszm_SmallAreaEmphasis                | 1.19263693  | 1.48036744  | -0.22311150 | 2.1733612  | Rejected  |
| glszm_SmallAreaHighGrayLevelEmphasis   | 1.28817495  | 1.22014317  | -1.36203263 | 2.8929392  | Rejected  |
| glszm_SmallAreaLowGrayLevelEmphasis    | 1.13888586  | 0.87291937  | -0.38718983 | 3.0949663  | Rejected  |
| glszm_ZoneEntropy                      | 1.33471078  | 1.58867723  | -0.21555068 | 2.4468728  | Rejected  |
| glszm_ZonePercentage                   | 5.00162175  | 5.00882786  | 2.98730446  | 6.7334022  | Confirmed |
| glszm_ZoneVariance                     | 4.41800856  | 4.51563720  | 2.69168804  | 5.9308521  | Confirmed |
| gldm_DependenceEntropy                 | 1.18161994  | 1.56159913  | -1.13460341 | 2.8745154  | Rejected  |
| gldm_DependenceNonUniformity           | 10.96221136 | 11.13097391 | 8.54542612  | 12.8445948 | Confirmed |
| gldm_DependenceNonUniformityNormalized | 4.51733098  | 4.48688664  | 2.34459607  | 6.3799840  | Confirmed |
| gldm_DependenceVariance                | 4.96678640  | 5.01815975  | 2.60574703  | 7.1888311  | Confirmed |
| gldm_GrayLevelNonUniformity            | 3.89292678  | 3.88923839  | 2.16768636  | 5.4180304  | Confirmed |
| gldm_GrayLevelVariance                 | 0.66176709  | 0.78815226  | -1.14311790 | 2.0240843  | Rejected  |
| gldm_HighGrayLevelEmphasis             | 2.49737051  | 2.60838586  | 0.07231512  | 3.9395173  | Rejected  |
| gldm_LargeDependenceEmphasis           | 1.04361487  | 1.09120050  | -0.56283247 | 2.7247942  | Rejected  |

|                                           |            |            |             |           |           |
|-------------------------------------------|------------|------------|-------------|-----------|-----------|
| gldm_LargeDependenceHighGrayLevelEmphasis | 3.03332742 | 3.04978462 | 1.02329084  | 4.6856391 | Tentative |
| gldm_LargeDependenceLowGrayLevelEmphasis  | 2.28031351 | 2.45878947 | 0.27000664  | 3.9242001 | Rejected  |
| gldm_LowGrayLevelEmphasis                 | 2.01800600 | 1.93397330 | 0.75369701  | 3.8278209 | Rejected  |
| gldm_SmallDependenceEmphasis              | 2.92368800 | 2.93723149 | 1.64098471  | 4.2567670 | Tentative |
| gldm_SmallDependenceHighGrayLevelEmphasis | 1.68455654 | 1.80430983 | 0.08859649  | 2.6622981 | Rejected  |
| gldm_SmallDependenceLowGrayLevelEmphasis  | 1.41928524 | 1.68315308 | -0.61893119 | 2.5185854 | Rejected  |
| ngtdm_Busyness                            | 2.42258370 | 2.39936564 | 0.31966934  | 4.0439238 | Rejected  |
| ngtdm_Coarseness                          | 5.24710430 | 5.25194846 | 3.33952740  | 6.5647794 | Confirmed |
| ngtdm_Complexity                          | 1.33039668 | 1.42345122 | -0.11354229 | 3.0676271 | Rejected  |
| ngtdm_Contrast                            | 0.81413695 | 1.05621058 | -0.95910710 | 2.3720056 | Rejected  |
| ngtdm_Strength                            | 2.99753322 | 2.97033813 | 0.72773784  | 4.8129675 | Tentative |
